# Supplementary material
Source: Springer Nature journal article supplement (https://www.springermedizin.de/resource/supplementary/12879_2013_4185_MOESM1_ESM.pdf/9446104)
Supplement: MOESM1 [file 9446104]

200 PATIENTS TREATED FOR  
PVGI

91 selected patients  
treated for  
staphylococcal PVGI

7 excluded for absence of  
complete datas or insufficient  
follow-up

84 patients with a follow-up > 1 year

Definite PVGI : early (n=42), late  
(n=34)

Presumed PVGI (n=8)

Intracavitary PVGI : n=47

Extracavitary PVGI : n=37

Initial Surgical treatment: n=68 [autologous vein n=12, arterial homo/allograft  
n=24, new prosthesis (n=8), debridement (n=24)

Initial medical treatment : n=14

New surgery (n=25)

Adequate empirical treatment n=79

Death: directly related to PVGI :  
n=16

Failure n=21 (25%)

Remission n=63 (75%)

median length of follow-up: 470 ±  
469 days
